# Supplementary material for: Iron chelation improves ineffective erythropoiesis and iron overload in myelodysplastic syndrome mice
Source: eLife. 2023 Dec 28;12:e83103. doi: 10.7554/eLife.83103 (PMC10754500; doi:10.7554/eLife.83103)
Supplement: Figure 1—figure supplement 1—source data 1. [file elife-83103-fig1-figsupp1-data1.xlsx]

## Sheet: Sheet1
	WT	MDS
ProE	0.4	1.2
	1	2.6
	1.6	1.1
	0	1.6
	22.8	1.8
	5.5	0.9
	1.4	23.6
	0.5	68.9
	0.2	68
		32.3
		17.9
BasoE	0.1	0.3
	0.1	0.6
	1.2	0
	0.2	2
	12.4	1.4
	2.3	0.3
	0.1	20.8
	0.2	65.3
	0.2	69.9
		14.3
		15.1
PolyE	0.6	2.9
	0.6	1.4
	3.6	1.3
	0.9	1.9
	8.2	4.4
	0.6	3.4
	0.2	23.6
	0.1	57.9
	0.1	61.9
		8.7
		13.9
OrthoE	0.9	4.1
	0.6	4
	5	2.2
	0.9	4
	4.7	5.1
	1.4	3.4
	1.9	1.1
	3.9	11.7
	1.5	21.7
		8.8
		19.9
