# Supplementary material for: Iron chelation improves ineffective erythropoiesis and iron overload in myelodysplastic syndrome mice
Source: eLife. 2023 Dec 28;12:e83103. doi: 10.7554/eLife.83103 (PMC10754500; doi:10.7554/eLife.83103)
Supplement: Figure 1—figure supplement 3—source data 1. [file elife-83103-fig1-figsupp3-data1.xlsx]

## Sheet: Sheet1
	MDS	MDS DFP
male	36.8206	50.7463
	28.3775	43.5331
	42.4581	50.3145
	30.3752
female	51.0949	68.4864
	51.7241	53.7986
	48.0094	58.0065
	48.8582	50.2264
		70.6085
		70.6179
