# Supplementary material for: Iron chelation improves ineffective erythropoiesis and iron overload in myelodysplastic syndrome mice
Source: eLife. 2023 Dec 28;12:e83103. doi: 10.7554/eLife.83103 (PMC10754500; doi:10.7554/eLife.83103)
Supplement: Figure 1—figure supplement 4—source data 2. [file elife-83103-fig1-figsupp4-data2.xlsx]

## Sheet: Sheet1
WT	MDS	MDS DFP
0.496787	0.599869	0.842268
1.06078	0.541501	0.74753
2.38394	1.93844	4.78698
4.36102	2.5673	4.49268
