# Supplementary material for: Iron chelation improves ineffective erythropoiesis and iron overload in myelodysplastic syndrome mice
Source: eLife. 2023 Dec 28;12:e83103. doi: 10.7554/eLife.83103 (PMC10754500; doi:10.7554/eLife.83103)
Supplement: Figure 1—figure supplement 6—source data 1. [file elife-83103-fig1-figsupp6-data1.xlsx]

## Sheet: Sheet1
WT	WT DFP
0.69	0.31
3.36	0.81
1.69	0.46
0.83	0.91
2.07	0.87
0.69
0.78
0.46
0.73
1.09
0.3
2.52
