# Supplementary material for: Iron chelation improves ineffective erythropoiesis and iron overload in myelodysplastic syndrome mice
Source: eLife. 2023 Dec 28;12:e83103. doi: 10.7554/eLife.83103 (PMC10754500; doi:10.7554/eLife.83103)
Supplement: Figure 1—source data 1. [file elife-83103-fig1-data1.xlsx]

## Sheet: Sheet1
	A	B	C	D	F (2^-ddCt)	G	H
WT	182	52.6925	0.319301	1.5846	3.15383	7.08389	0.692866
	136	36.8964	0.34036	2.06838	1.10701	2.46466	3.36149
	90	26.7539	0.217123	1.60223	0.953496	2.95332	1.69455
	120	33.5008	0.341899	0.980588	0.335431	1.05052	0.827514
	160	45.0958	0.0445211	1.04954	0.8986	2.93732	2.07439
	96	29.0909	0.0449155	1.64353	2.31465	6.76998	0.694814
	106	31.6986	0.322856	1.41051	0.442509	1.30012	0.782523
	206	50.0729		1.44728	0.989287	4.55634	0.458106
	114	41.2148		1.70668	0.983537		0.726228
	174	46.6738					1.09191
	134	39.9047					0.296988
	126	41.8605					2.51634
MDS	126	36.8206	0.605955	4.6157	1.12347	3.50239	5.89823
	92	28.3775	0.510246	8.68333	0.447881	4.02957	4.92091
	152	42.4581	0.441688	7.01255	1.19368	2.55692	2.8695
	102	30.3752	0.469449	6.37965	0.885148	0.672337	8.879
	196	51.0949	0.407458	7.14802	1.61978	1.30882	6.27822
	204	51.7241	0.470171	6.71916	0.407406	1.3346	10.0495
	164	48.0094	0.441216	6.82638	0.667819	0.65907	10.8366
	184	48.8582			0.589477		5.29832
					0.3094		3.46472
							3.29364
							5.70263
							2.94427
MDS+DFP	170	50.7463	0.108988	2.68368	0.930615	10.8749	7.66263
	138	43.5331	0.0345312	2.51946	0.952357	8.31641	7.89912
	160	50.3145	0.167959	3.68598	0.264326	7.51005	5.1568
	276	68.4864	0.10211	5.6601	0.732274	20.8593	1.34519
	296	53.7986	0.0539583	3.05925	0.396665	10.1811	10.4258
	284	58.0065	0.0351054	3.23509	0.471254	4.3239	1.21613
	304	50.2264	0.0389608	3.51306	0.239589	6.93833	2.00044
	244	70.6085	0.0351963	2.25007	0.75057	4.46876	0.680823
	246	70.6179	0.0855746	2.95153	0.496097	4.85845	2.33103
	224		0.114515		0.333996	6.18988	2.15091
