# Supplementary material for: Iron chelation improves ineffective erythropoiesis and iron overload in myelodysplastic syndrome mice
Source: eLife. 2023 Dec 28;12:e83103. doi: 10.7554/eLife.83103 (PMC10754500; doi:10.7554/eLife.83103)
Supplement: Figure 2—figure supplement 1—source data 1. [file elife-83103-fig2-figsupp1-data1.xlsx]

## Sheet: Sheet1
	MDS	MDS DFP
male	9.7	11.9
	10	11.2
	11.7	11.9
	12.4	12.9
	9.8
	8.3
female	12.5	13.5
	13.1	19.5
	11.3	12
	11.3	17.5
		18.5
		12.8
		14.7
		11.9
		10.1
