# Supplementary material for: Iron chelation improves ineffective erythropoiesis and iron overload in myelodysplastic syndrome mice
Source: eLife. 2023 Dec 28;12:e83103. doi: 10.7554/eLife.83103 (PMC10754500; doi:10.7554/eLife.83103)
Supplement: Figure 2—source data 1. [file elife-83103-fig2-data1.xlsx]

## Sheet: Sheet1
	A	B	C	D	E	F	G	H	I
WT	9.13	14.4	51.2	380.7	962	4.83	1.97	9.63	0.04
	9.8	14.1	51.3	423.4	755	8.47	0.86	2.26	0.04
	10.21	15	49.2	370.6	372	10.77	0.76	7.58	0.04
	9.12	14.6	55.2	609.2	843	3.94	1.56	2.27	0.43
	10.05	14.6	51	361.8	668	8.53	0.61	7.21	0.05
	9.9	14.3	49	324.7	837	3.52	0.6	1.28	0.02
	9.92	14.2	49.5	320.4	858	2.86	0.43	5.69	0.04
	9.99	14.5	51	858	1001	5.62	0.78	3.23	0.01
	10.81	15.3	49.2	1001	648	5.25	0.86	2.15	0
	9.21	13.8	50.4	648	908	5.41	1.35	2.81	0.01
	10.49	15.3	48	464.3	1055	4.32	1.02	2.34	0.01
	10.32	14.6	47.3	174.3	782	2.5	0.33	13.9	4.62
	10.6	15.6	50		868	4.1	2.5	16.4	4.26
	10.25	15.1	50.1			6.83	1.01	25	3.93
MDS	6.5	13.1	61.2	556.6	520	3.78	1.48	1.4	0.88
	7.84	11.3	67.4	561.8	576	2.46	0.97	4.65	0.04
	6.1	12.5	61	475.5	385	2.42	0.82	2.83	0.04
	7.26	9.7	63.3	310.8	1182	0.93	0.32	2.24	0.01
	5.61	9.4	59.3	346.1	559	1.49	0.64	1.38	0.05
	5.72	11.3	54.1	363.6	497	4.44	2.42	1.54	0.03
	7.36	12.4	52.3	547.8	321	4.73	1.79	0.6	0.01
	8.14	10	62.3	398.2	750	2.59	0.81	0.81	0.02
	5.68	9.7	60.2	356.3	838	2.92	1.22	1.02	0.12
	5.71	11.7	57	560.2	1019	1.37	0.49	35.8	0.84
	7.21	12.4	58.6	364.8	744	5.39	1.65	30.6	3.6
	7.4							37.8	2.78
								31.3	1.7
								41.8	1.65
								1.13	0.06
MDS + DFP
	7	13.5	58.2	284	920	3.7	1.29	0.96	0.03
	11.6	19.5	47.6	283	710	5.15	1.25	1.41	0.06
	6.05	12	60.8	237.5	635	2.4	1.22	0.82	0.02
	10.2	17.5	48.8	506.3	620	7.5	0.42	0.57	0.03
	11.35	18.5	47	425.4	1275	4.1	0.78	47.6	1.34
	7.37	11.9	58.3	452.7	590	2.71	0.54	52.1	1.07
	6.72	11.2	62.5	417.9	863	2.4	0.2	49.8	1.22
	7.29	11.9	60.1	503.4	615	2.45		5.24	1.95
	7.18	12.8	61.4	755.7	473	1.42		0.4	0.09
	8.8	14.7	56.3		439	2.36
	6.41	11.9	66.3		607	1.41
	7.63	12.9	57		555	0.81
