# Supplementary material for: Iron chelation improves ineffective erythropoiesis and iron overload in myelodysplastic syndrome mice
Source: eLife. 2023 Dec 28;12:e83103. doi: 10.7554/eLife.83103 (PMC10754500; doi:10.7554/eLife.83103)
Supplement: Figure 3—figure supplement 2—source data 1. [file elife-83103-fig3-figsupp2-data1.xlsx]

## Sheet: Sheet1
	WT	WT DFP
RBC	9.13	10.63
	9.8	9.9
	10.21	10.05
	9.12	9.96
	10.05	9.93
	9.9
	9.92
	9.99
	10.81
	9.21
	10.49
	10.32
	10.6
	10.25
Hb	14.4	16.1
	14.1	14.8
	15	15
	14.6	14.8
	14.6	14.9
	14.3
	14.2
	14.5
	15.3
	13.8
	15.3
	14.6
	15.6
	15.1
MCV	51.2	52.1
	51.3	50.9
	49.2	51
	55.2	50.2
	51	51
	49
	49.5
	51
	49.2
	50.4
	48
	47.3
	50
	50.1
retics	380.7	316.8
	423.4	549.5
	370.6	561.8
	609.2	309.8
	361.8	276.1
	324.7
	320.4
	858
	1001
	648
	464.3
	174.3
EPO	186	176
	140	239
	110	296
	149	289
	84	457
	449	194
	326	444
	425	345
	447
	263
	632
	480
