# Supplementary material for: Iron chelation improves ineffective erythropoiesis and iron overload in myelodysplastic syndrome mice
Source: eLife. 2023 Dec 28;12:e83103. doi: 10.7554/eLife.83103 (PMC10754500; doi:10.7554/eLife.83103)
Supplement: Figure 3—figure supplement 3—source data 1. [file elife-83103-fig3-figsupp3-data1.xlsx]

## Sheet: Sheet1
WT	WT DFP
37.01	17.57
37.66	26.52
16.12	26.82
36.43	21.52
29.69	22.79
31.84
30.3
25.28
31.23
30.08
19.77
32.95
36.05
