# Supplementary material for: Iron chelation improves ineffective erythropoiesis and iron overload in myelodysplastic syndrome mice
Source: eLife. 2023 Dec 28;12:e83103. doi: 10.7554/eLife.83103 (PMC10754500; doi:10.7554/eLife.83103)
Supplement: Figure 3—figure supplement 3—source data 2. [file elife-83103-fig3-figsupp3-data2.xlsx]

## Sheet: Sheet1
	WT	WT DFP
ProE	2.1	1.3
	2.7	1.9
	1.3	2.6
	2.4	1.5
	2	2.2
	2
	2.3
	2.3
	2
	2.2
	1.4
BasoE	4.3	2.6
	4.6	4.1
	2.8	4.1
	4.8	3.3
	4.2	3.6
	4.2
	4.9
	4.6
	4
	4.4
	2.9
PolyE	9.8	5
	10.2	8.3
	5.6	7.6
	9.7	6.4
	8.4	6.5
	8.4
	9.9
	9.2
	8
	9.2
	5.8
OrthoE	20	9.5
	20.3	14.2
	11.3	13.7
	19.3	12.3
	16.6	11.6
	16.8
	20
	18.4
	16.4
	18.5
	11.8
