# Supplementary material for: Iron chelation improves ineffective erythropoiesis and iron overload in myelodysplastic syndrome mice
Source: eLife. 2023 Dec 28;12:e83103. doi: 10.7554/eLife.83103 (PMC10754500; doi:10.7554/eLife.83103)
Supplement: Figure 3—figure supplement 4—source data 1. [file elife-83103-fig3-figsupp4-data1.xlsx]

## Sheet: Sheet1
	WT	WT DFP
act caspase	0.8	0.3
	0.6	0.8
	4	0.3
	0.8	0.1
	0	0.1
	0
	0
	0
	0.1
ROS	2010	1405
	1695	1305
	2810	1402
	1412	1355
	1456	1381
	2189	1386
	2262
	1389
	1386
	1705
	1459
