# Supplementary material for: Iron chelation improves ineffective erythropoiesis and iron overload in myelodysplastic syndrome mice
Source: eLife. 2023 Dec 28;12:e83103. doi: 10.7554/eLife.83103 (PMC10754500; doi:10.7554/eLife.83103)
Supplement: Figure 3—figure supplement 5—source data 1. [file elife-83103-fig3-figsupp5-data1.xlsx]

## Sheet: Sheet1
	WT DFP	MDS DFP
DFP	1.9	0.119
	2.74	0.57
	1.67	0.517
	1.92	1.49
	2.54	1.91
G-DFP	6.69	0.167
	5.24	0.891
	3.79	0.782
	2.86	1.9
	5.05	3.43
