# Supplementary material for: Iron chelation improves ineffective erythropoiesis and iron overload in myelodysplastic syndrome mice
Source: eLife. 2023 Dec 28;12:e83103. doi: 10.7554/eLife.83103 (PMC10754500; doi:10.7554/eLife.83103)
Supplement: Figure 3—source data 1. [file elife-83103-fig3-data1.xlsx]

## Sheet: Sheet1
	A	C	D	E	F				G				H	I
					ProE	BasoE	PolyE	OrthoE	ProE	BasoE	PolyE	OrthoE
WT
	0.00262544	185.564	14	37	2.1	4.3	9.8	20	5.67568	11.6216	26.4865	54.0541	0.8	2.01
	0.00340784	140.42	13	38.6	2.7	4.6	10.2	20.3	6.99482	11.9171	26.4249	52.5907	0.6	1.695
	0.00329834	110.324	14.5	20.8	1.3	2.8	5.6	11.3	6.25	13.4615	26.9231	54.3269	4	2.81
	0.00332772	148.78	12.5	37.3	2.4	4.8	9.7	19.3	6.43432	12.8686	26.0054	51.7426	0.8	1.412
	0.00339246	83.572	10.5	30.9	2	4.2	8.4	16.6	6.47249	13.5922	27.1845	53.7217	0	1.456
	0.0037931	448.943	9	31	2	4.2	8.4	16.8	6.45161	13.5484	27.0968	54.1935	0	2.189
	0.00397908	325.749	14.5	37.6	2.3	4.9	9.9	20	6.11702	13.0319	26.3298	53.1915	0.1	2.262
	0.00452102	425.413	11.5	35.1	2.3	4.6	9.2	18.4	6.55271	13.1054	26.2108	52.4217	0	1.389
	0.00360271	446.509		31.3	2	4	8	16.4	6.38978	12.7796	25.5591	52.3962	0	1.386
	0.0034731	263.002		33.8	2.2	4.4	9.2	18.5	6.50888	13.0178	27.2189	54.7337		1.705
	0.00401712	631.504		23.5	1.4	2.9	5.8	11.8	5.95745	12.3404	24.6809	50.2128		1.459
	0.0040172	480.452							6.36033	12.8047	26.3939	53.0681
MDS
	0.0101682	6285.02	17.5	64.3	4.4	11.7	20.5	27.4	6.84292	18.196	31.8818	42.6128	4.1	16.296
	0.00445886	5074.49	16	23.7	1.4	3.4	6.9	11.4	5.90717	14.346	29.1139	48.1013	3.3	7.472
	0.0064	4131.48	16.5	28.8	2.2	5.5	8.3	12.5	7.63889	19.0972	28.8194	43.4028	1.8	8.287
	0.00337975	9249.52	10.5	39	1.4	4.6	10.8	22	3.58974	11.7949	27.6923	56.4103	2.8	12.733
	0.00536481	5464.23	13.5	17.8	2.3	1	3.8	13.5	5.23364	14.5794	33.0841	47.6636	4.9	3.564
	0.00316319	1274.27	13	53.5	2.8	7.8	17.7	25.5	8.46995	18.8525	33.3333	41.5301	3.8	4.088
	0.00523152	2345.92	16.5	36.6	3.1	6.9	12.2	15.2	6.57895	16.0088	31.3596	47.5877	0	5.232
	0.00378647		15.5	45.6	3	7.3	14.3	21.7	9.83607	19.6721	30.445	42.3888	0.8	4.575
			13.5	42.7	4.2	8.4	13	18.1	8.66142	15.2756	31.1811	44.0945	1	2.428
			19	63.5	5.5	9.7	19.8	28	5.50098	13.7525	28.2908	52.0629	0	2.396
				50.9	2.8	7	14.4	26.5	4.88323	13.1635	25.2654	57.5372	0.3	2.231
				47.1	2.3	6.2	11.9	27.1	5.89474	13.4737	26.1053	55.3684
				47.5	2.8	6.4	12.4	26.3	5.26316	12.7424	27.1468	55.4017
				36.1	1.9	4.6	9.8	20	6.03015	12.5628	24.3719	57.5377
				39.8	2.4	5	9.7	22.9	6.35893	14.9945	29.1255	49.945
MDS + DFP
	0.00447027	416.3	15.5	23.6	1	2.3	6.1	14.1	4.23729	9.74576	25.8475	59.7458	3.7	4.922
	0.00348432	207.3	11.25	55.9	2.5	2.5	9.6	29.8	4.47227	13.7746	27.5492	53.3095	3.2	1.852
	0.00544845	140.42	12.5	26.5	1.6	3.7	7.8	13.3	6.03774	13.9623	29.434	50.1887	2.9	5.663
	0.00539867	128.716	11.5	21.1	1.4	2.9	6.1	10.4	6.63507	13.7441	28.91	49.2891	0.4	2.406
	0.00397527		7.5	34.5	2.4	6.4	11.1	15.5	6.95652	18.5507	32.1739	44.9275	0.1	2.163
	0.00314373			35.3	1.7	5.5	11.8	17	4.81586	15.5807	33.4278	48.1586	0.5	5.106
	0.00274316			34.9	1.6	4.8	10.1	18.9	4.58453	13.7536	28.9398	54.1547	0.2	4.038
	0.00241369			43.8	3.2	6.6	10.8	21.5	7.30594	15.0685	24.6575	49.0868		3.127
	0.00545745			36.3	2.3	5	8.4	20.5	6.33609	13.7741	23.1405	56.4738		2.301
	0.00352734			49.9	4.2	5.3	12.5	23	8.41683	15.4309	25.0501	46.0922		2.843
	0.00754632			30.6	1.7	3.9	7.2	16.6	5.55556	12.7451	23.5294	54.2484		2.257
	0.00241339								6.01427	14.3986	27.3445	51.1213		2.128
