# Supplementary material for: Iron chelation improves ineffective erythropoiesis and iron overload in myelodysplastic syndrome mice
Source: eLife. 2023 Dec 28;12:e83103. doi: 10.7554/eLife.83103 (PMC10754500; doi:10.7554/eLife.83103)
Supplement: Figure 4—figure supplement 1—source data 1. [file elife-83103-fig4-figsupp1-data1.xlsx]

## Sheet: Sheet1
WT	WT DFP
0.66	1.32
1.09	2.92
0.94	1.33
0.6	3.76
1.17	3.78
0.49
1.09
1.28
1.23
1.65
0.55
2.79
