# Supplementary material for: Iron chelation improves ineffective erythropoiesis and iron overload in myelodysplastic syndrome mice
Source: eLife. 2023 Dec 28;12:e83103. doi: 10.7554/eLife.83103 (PMC10754500; doi:10.7554/eLife.83103)
Supplement: Figure 4—figure supplement 2—source data 2. [file elife-83103-fig4-figsupp2-data2.xlsx]

## Sheet: Sheet1
	MDS	MDS DFP
pSTAT / STAT / actin	4.75271	5.8821
	8.04204	7.44579
	10.6351	6.60157
pAKT / AKT / actin	29.0462	19.2873
	16.2706	23.0355
	17.3157	26.035
