# Supplementary material for: Iron chelation improves ineffective erythropoiesis and iron overload in myelodysplastic syndrome mice
Source: eLife. 2023 Dec 28;12:e83103. doi: 10.7554/eLife.83103 (PMC10754500; doi:10.7554/eLife.83103)
Supplement: Figure 4—source data 1. [file elife-83103-fig4-data1.xlsx]

## Sheet: Sheet1
	A	B	C	D	E	F	G	H
WT	1.03369	1	1.45558	2.77333	1.17762	0.972277	1.22934	0.512149
	1	0.758113	0.898818	0.73309	1.11646	0.99987	0.944958	1.31928
	0.967406	1.31906	0.764352	0.49186	0.760596	1.02865	0.860824	1.48002
MDS	3.35852	0.810852	0.3406	0.0284536	2.43918	1.39186	1.12513	0.123392
	3.06706	0.413458	0.528054	0.451412	0.832753	0.847552	1.06152	0.114148
	2.50986	0.763509	0.575849	0.133681	1.38152	0.844158	1.07628	0.107846
MDS + DFP	2.81915	23.651	8.73299	0.635849	1.3091	1.89659	2.26601	3.55605
	1.70769	35.8108	10.2789	3.25075	0.679625	0.576084	1.05725	1.53018
	0.701867	2.74896	2.65395	1.33652	2.20394	3.14042	3.20265	4.288
