# Supplementary material for: Iron chelation improves ineffective erythropoiesis and iron overload in myelodysplastic syndrome mice
Source: eLife. 2023 Dec 28;12:e83103. doi: 10.7554/eLife.83103 (PMC10754500; doi:10.7554/eLife.83103)
Supplement: Figure 5—figure supplement 1—source data 1. [file elife-83103-fig5-figsupp1-data1.xlsx]

## Sheet: Sheet1
WT	WT DFP
0.43	1.92
0.5	3.77
0.59	0.3
0.32	6.75
0.86	0.74
0.64
2.31
2.03
2.08
1.76
