# Supplementary material for: Iron chelation improves ineffective erythropoiesis and iron overload in myelodysplastic syndrome mice
Source: eLife. 2023 Dec 28;12:e83103. doi: 10.7554/eLife.83103 (PMC10754500; doi:10.7554/eLife.83103)
Supplement: Figure 5—figure supplement 2—source data 1. [file elife-83103-fig5-figsupp2-data1.xlsx]

## Sheet: Sheet1
WT	MDS	MDS DFP
19.5	12	11.6
21.6	11.6	12.8
23.7	11.5	23.8
26.8	13.7	19.4
21.1	20	24
25.9
24.2
