# Supplementary material for: Iron chelation improves ineffective erythropoiesis and iron overload in myelodysplastic syndrome mice
Source: eLife. 2023 Dec 28;12:e83103. doi: 10.7554/eLife.83103 (PMC10754500; doi:10.7554/eLife.83103)
Supplement: Figure 5—source data 1. [file elife-83103-fig5-data1.xlsx]

## Sheet: Sheet1
	A	B	C	D
WT	1.34363	2.61827	1.34299	0.752524
	0.838886	0.784215	0.80116	1.15046
	0.88719	0.487023	0.929409	1.15507
MDS	10.7341	25.6798	0.810615	0.0053562
	3.40722	11.6461	0.46047	0.00654221
	4.41264	11.4715	0.567288	0.0051334
MDS + DFP	7.81187	231.301	10.646	3.11082
	4.698	62.4317	4.54831	1.39296
	5.75286	101.936	6.56552	1.50688
