# Supplementary material for: Iron chelation improves ineffective erythropoiesis and iron overload in myelodysplastic syndrome mice
Source: eLife. 2023 Dec 28;12:e83103. doi: 10.7554/eLife.83103 (PMC10754500; doi:10.7554/eLife.83103)
Supplement: Figure 6—source data 1. [file elife-83103-fig6-data1.xlsx]

## Sheet: Sheet1
	A	B	C	D	E
WT	7.116	1.21236	0.722817	1.35055	0.607452
	9.739	1.00658	1.46849	1.02743	1.17915
	2.438	0.819439	0.942111	0.720672	1.39611
	5.701
	7.033
	4.997
	3.604
	1.884
	2.391
	20.961
	13.053
	14.926
	13.296
MDS	0.893	8.07704	14.1108	0.951796	0.0106774
	0.556	4.45393	9.78905	0.809982	0.0105301
	1.407	4.63132	6.98701	0.640389	0.00847996
	1.748
	9.052
	20.792
	12.849
	15.193
	40.933
	12.156
	21.563
MDS + DFP	0.933	3.57966	137.983	14.5257	2.4751
	0.591	1.90553	33.8224	6.36433	1.10976
	1.277	3.69606	101.001	14.0143	2.21287
	0.58
	0.531
	4.108
	5.393
	9.729
	8.373
	0.81
	8.701
	8.754
