# Supplementary material for: Iron chelation improves ineffective erythropoiesis and iron overload in myelodysplastic syndrome mice
Source: eLife. 2023 Dec 28;12:e83103. doi: 10.7554/eLife.83103 (PMC10754500; doi:10.7554/eLife.83103)
Supplement: Figure 7—figure supplement 1—source data 1. [file elife-83103-fig7-figsupp1-data1.xlsx]

## Sheet: Sheet1
	WT	MDS	MDS DFP
BasoE	1.14	0.95	2.46
	0.96	0.65	0.93
	0.91	0.82	1.5
PolyE	1.22	0.92	2
	0.87	0.71	0.74
	0.94	0.82	1.14
OrthoE	0.58	0.75	1.21
	1.23	0.71	0.46
	1.41	0.63	0.62
