# Supplementary material for: Iron chelation improves ineffective erythropoiesis and iron overload in myelodysplastic syndrome mice
Source: eLife. 2023 Dec 28;12:e83103. doi: 10.7554/eLife.83103 (PMC10754500; doi:10.7554/eLife.83103)
Supplement: Figure 7—figure supplement 2—source data 1. [file elife-83103-fig7-figsupp2-data1.xlsx]

## Sheet: Sheet1
	WT	MDS	MDS DFP
ProE	0.82	1.58	1.65
	1.23	0.63	0.38
	0.99	0.79	1.27
BasoE	1.14	0.84	0.95
	0.89	0.95	0.3
	0.98	1.01	1.2
PolyE	0.88	0.97	1.25
	1.02	0.97	0.51
	1.11	1.18	1.66
OrthoE	0.46	1.06	0.54
	1.18	1.23	0.68
	1.84	0.95	1.59
