# Supplementary material for: Iron chelation improves ineffective erythropoiesis and iron overload in myelodysplastic syndrome mice
Source: eLife. 2023 Dec 28;12:e83103. doi: 10.7554/eLife.83103 (PMC10754500; doi:10.7554/eLife.83103)
Supplement: Figure 7—source data 1. [file elife-83103-fig7-data1.xlsx]

## Sheet: Sheet1
	A	B	C	D	E	F
		ProE	BasoE	PolyE	OrthoE
WT	33.768	1.07091	0.762612	0.749143	0.422012	0.21692
	27.333	0.865421	0.641119	0.536634	0.894954	0.477984
	28.546	1.07899	0.608257	0.575556	1.03141
	11.534
	11.666
	13.892
MDS	30.88	1.73237	0.202753	0.180895	0.174632	0.320167
	31.511	0.763485	0.138298	0.138926	0.166856	0.439781
	35.937	0.756066	0.175019	0.161495	0.148288
MDS + DFP	47.294	1.42369	0.612464	0.458791	0.329375	0.531546
	40.815	0.834144	0.232668	0.16974	0.125016	0.65199
	37.854	0.842064	0.374683	0.261599	0.168923
	30.523
	11.325
	11.56
