# Supplementary material for: Iron chelation improves ineffective erythropoiesis and iron overload in myelodysplastic syndrome mice
Source: eLife. 2023 Dec 28;12:e83103. doi: 10.7554/eLife.83103 (PMC10754500; doi:10.7554/eLife.83103)
Supplement: Figure 8—figure supplement 1—source data 1. [file elife-83103-fig8-figsupp1-data1.xlsx]

## Sheet: Sheet1
	WT	MDS	MDS DFP
ProE	1.12	7.62	2.44
	0.97	3.99	1.55
	0.92	4.09	3
BasoE	1.06	1.85	8.2
	0.96	1.57	3.22
	0.98	1.99	7.59
PolyE	1.02	1.18	3.08
	0.96	1.21	1.18
	1.01	1.52	3.05
OrthoE	0.53	0.38	1.37
	1.24	0.38	0.49
	1.53	0.27	1.03
