# Supplementary material for: Iron chelation improves ineffective erythropoiesis and iron overload in myelodysplastic syndrome mice
Source: eLife. 2023 Dec 28;12:e83103. doi: 10.7554/eLife.83103 (PMC10754500; doi:10.7554/eLife.83103)
Supplement: Figure 8—source data 1. [file elife-83103-fig8-data1.xlsx]

## Sheet: Sheet1
	A	B	C	D	E	F	G	H
WT	1.228	1.30166	1.24702	0.614639	1.12286	1.30113	1.05231	0.642928
	0.894586	1.04402	1.13597	1.1477	0.889234	0.802673	0.936041	1.05253
	0.910287	0.735856	0.705926	1.41759	1.00151	0.957504	1.01522	1.47776
MDS	9.9856	2.27232	1.48704	0.247517	4.00931	1.26207	0.938362	0.271933
	5.57471	2.069	1.67926	0.224313	1.9386	0.826109	0.847088	0.239638
	6.20655	1.96825	1.9566	0.227431	1.94801	0.588236	0.984316	0.235433
MDS + DFP	7.79054	37.1675	14.4875	2.25456	1.33138	2.67103	2.26428	2.6818
	4.08024	12.8229	3.70126	0.769335	1.2982	0.90796	0.799632	1.07049
	8.10257	27.8877	13.9399	1.2252	1.44369	2.07744	2.05907	2.4212
