# Supplementary material for: Iron chelation improves ineffective erythropoiesis and iron overload in myelodysplastic syndrome mice
Source: eLife. 2023 Dec 28;12:e83103. doi: 10.7554/eLife.83103 (PMC10754500; doi:10.7554/eLife.83103)
Supplement: Figure 9—source data 1. [file elife-83103-fig9-data1.xlsx]

## Sheet: Sheet1
A	normal	36.639	51.2274	59.2227	38.109	51.091	34.5944	51.5458	56.6498	57.2468	50.8084	34.7856	21.0264	48.2104	95.1559	54.8169	36.02	33.3944
	MDS	57.412	62.2838	37.0558	89.7423	73.2922	40.4225	60.3512	24.5253	50.5819	55.1258	43.4438	29.2948	37.9528	40.5464	39.9333	41.8644	31.5673	21.9252	41.2283	55.7087	39.7238	91.6337	22.6094	75.6992	223.5	176.22	85.544	44.2398	60.4252	103.868	98.4899	16.1196	47.3993	133.919	40.9707	41.3086	47.5259	26.595	23.3401	19.4117	49.5718	30.5294	69.5597	108.958	59.8964	133.562	40.5216	200.346
B	normal	149.708	116.698	75.5766	103.29	150.547	91.2977	94.1432	79.0262	106.982	86.023	117.288	69.9869	88.0578	97.4138	64.9229	69.6575	84.3202
	MDS	234.9	153.139	140.223	192.112	115.952	317.472	99.8762	151.515	103.678	197.047	115.585	138.826	90.5966	85.3686	199.345	219.416	92.1037	91.6403	131.462	79.2286	103.432	110.536	165.913	115.727	198.228	138.786	94.0076	189.132	72.2593	94.0653	56.154	108.645	112.221	168.771	87.3974	102.209	49.0442	228.326	85.8497	90.701	97.3997	95.4992	120.049	139.076	123.622	140.052	159.192	144.927
C	normal	106.256	90.8318	86.9672	109.71	111.741	82.2324	92.8332	95.7887	112.099	112.605	113.228	125.755	117.724	129.993	86.8075	102.545	80.0462
	MDS	160.759	117.115	152.407	201.795	114.586	230.317	130.838	95.7921	112.695	153.399	115.39	126.446	84.9911	89.9494	152.996	182.204	151.03	111.564	245.251	100.903	111.797	111.291	109.79	147.1	377.14	230.915	105.573	194.529	86.1998	79.0148	80.2772	107.837	127.433	186.722	108.833	112.16	153.565	212.631	120.996	90.2155	100.7	103.588	115.39	146.655	134.722	155.345	150.715	109.529
D	normal	165.424	112.059	134.659	128.554	177.245	127.843	462.486	229.481	290.423	275.424	310.393	129.092	267.369	218.588	237.196	228.376	259.475
	MDS	257.519	185.128	292.355	334.495	244.519	741.387	134.097	264.647	134.62	236.003	145.839	128.721	76.7675	118.451	154.904	144.844	135.672	231.257	301.423	278.537	263.905	503.089	388.937	278.176	285.404	251.088	237.282	214.392	142.299	412.607	131.117	470.926	404.017	769.357	405.622	283.069	334.279	603.42	272.837	221.202	193.39	409.999	210.884	363.888	182.296	339.717	172.607	164.165
E	normal	45.1803	40.5055	45.7535	46.5415	56.9465	62.6709	39.1315	27.9193	26.6861	32.0104	32.0612	33.4029	28.804	33.5851	26.5309	31.3248	33.6383
	MDS	106.256	84.9636	66.2339	140.446	108.211	133.509	38.1488	92.9771	70.5413	72.9972	48.5328	49.9284	55.3866	39.4997	99.295	86.9827	32.3582	35.9137	80.9772	43.7642	32.2477	61.9571	102.084	37.3385	169.27	34.8308	45.566	99.4919	37.4544	59.6273	29.8562	42.5808	36.2047	98.6	31.3881	48.8644	42.362	78.5352	78.3008	26.9246	36.359	69.472	40.5668	43.2844	37.8205	66.9464	37.8368	105.448
G	normal	1144.61	1014.78	760.485	833.832	875.257	776.764	1257.36	1800.94	1734.1	1847.67	1689.94	971.359	1226.49	1249.41	1185.61	1050.26	1177.31
	MDS	1751.04	1195.43	1842.35	1451.72	826.831	1125.39	1057.55	734.66	1175.62	1015.66	668.422	805.14	720.948	770.411	759.635	1160.89	1141.4	1884.84	1099.9	1534.8	1356.07	1794.27	1736.41	1549.64	1681.56	1906.42	1733.53	1128.32	1231.54	1815.4	988.089	1176.13	1965.84	1761.04	1377.83	1260.26	1200.09	1172.07	1087.57	1254.37	1247.43	2386.77	742.991	1445.77	1269.01	1114.9	1211.39	1218.83
H	normal	156.198	223.42	252.804	208.955	200.852	167.239	361.314	312.536	334.941	348.154	355.121	321.952	275.137	285.681	291.083	291.146	267.071
	MDS	317.197	150.59	257.584	453.25	254.411	334.519	197.181	323.766	177.763	268.75	216.714	167.287	236.607	213.606	143.991	343.049	303.548	461.338	298.012	330.769	286.898	294.755	276.867	423.738	532.899	381.815	364.635	262.653	189.835	406.045	332.513	375.513	366.4	339.962	347.602	336.162	247.033	340.207	248.497	410.812	279.059	331.246	308.62	292.871	295.414	351.911	282.529	265.555
I	normal	7691.01	7205.53	8595.96	7712.1	7271.78	6120.18	7583.72	7912.48	9657.36	8931.84	9125.01	6106.98	6570.3	7337.03	8088.85	8260.23	7137.85
	MDS	8857.5	6020.91	8934.41	11809.2	8596.58	15791	8519.52	8740.86	8394	9403.33	9681.4	7221.66	8917.69	5729.33	9145.42	7484.39	6437.68	7074.36	7008.93	6833.41	8986.71	9204.25	12214.1	5627.46	6183.57	6953.1	6509.98	9960.16	7997.86	10102.9	6908.17	15637	8856.87	11335.7	11826.2	10850.6	8852.4	11716.8	9824.39	7452.38	6079.31	7395.41	7873.23	8656.24	7384.77	9036.04	7320.67	6111.83
[truncated: 135 more columns]
